# Supplementary material
Source: Royal Society of Chemistry journal article supplement (doi:10.1039/d6fo00469e)

## Supporting Information

### **Milk exosomes attenuate OVA-induced food allergy by regulating Th1/Th2 balance and remodeling gut microbiota**

Siqi Fu<sup>#1,2,3</sup>, Chao Zhang<sup>#1,2,3</sup>, Yan Liu<sup>1,2,3</sup>, Xin Ma<sup>1,2,3</sup>, Ruofan Xie<sup>1,2,3</sup>, Hongbing Chen<sup>1,3,4,5</sup>,  
and Xin Li<sup>1,2,3,5\*</sup>

<sup>1</sup>*State Key Laboratory of Food Science and Resources, Nanchang University, Nanchang 330047, P.R. China.*

<sup>2</sup>*College of Food Science and Technology, Nanchang University, Nanchang 330047, P.R. China.*

<sup>3</sup>*Jiangxi Provincial Key Laboratory of Food Allergy, Nanchang University, Nanchang, 330047, P.R. China.*

<sup>4</sup>*Sino German Joint Research Institute, Nanchang University, 235 Nanjing Dong Road, Nanchang, Jiangxi, 330047, China.*

<sup>5</sup>*International Institute of Food Innovation Co., Ltd., Nanchang University, Jiangxi, China*

**#These authors contributed equally to this work.**

**\*Corresponding author.**

**Xin Li, Professor**

School of Food Science and Technology, Nanchang University, Nanchang 330047, China.

Address: No. 235 Nanjing Eastern Road, Nanchang 330047, China

Fax: +86 791 8333708; Tel: +86-791-8830 4447

E-mail address:

**Table S1 Primer sequence information**

| Primer name     | Forward primer sequence (5'-3') | Reverse primer sequence (5'-3') |
|-----------------|---------------------------------|---------------------------------|
| <i>GAPDH</i>    | CCTGTTGCTGTAGCCGTATTCA          | CCAGGTTGTCTCCTGCGACTT           |
| <i>ZO-1</i>     | CGAGGCATCATCCCAAATAAGAA<br>C    | TCCAGAAGTCTGCCCGATCAC           |
| <i>Occludin</i> | TTGAAAGTCCACCTCCTTACAGA         | CCGGATAAAAAGAGTACGCTGG          |
| <i>MUC2</i>     | GGCTGTATTCCCCTCCATCG            | CCAGTTGGTAACAATGCCATGT          |

**Fig. S1. Characterization of M-Exo.** (A) TEM of M-Exo. (B) The particle size distribution of M-Exo. (C) WB analysis of proteins (CD9, TSG101, CD63 and Calnexin) expression.

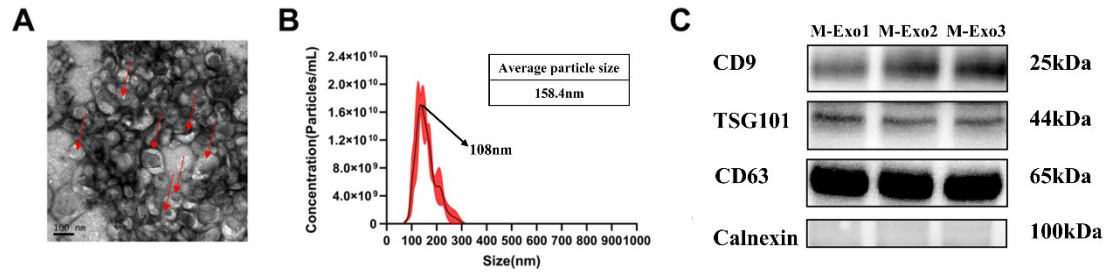

**Fig. S2 . Demonstration of the original WB strip**

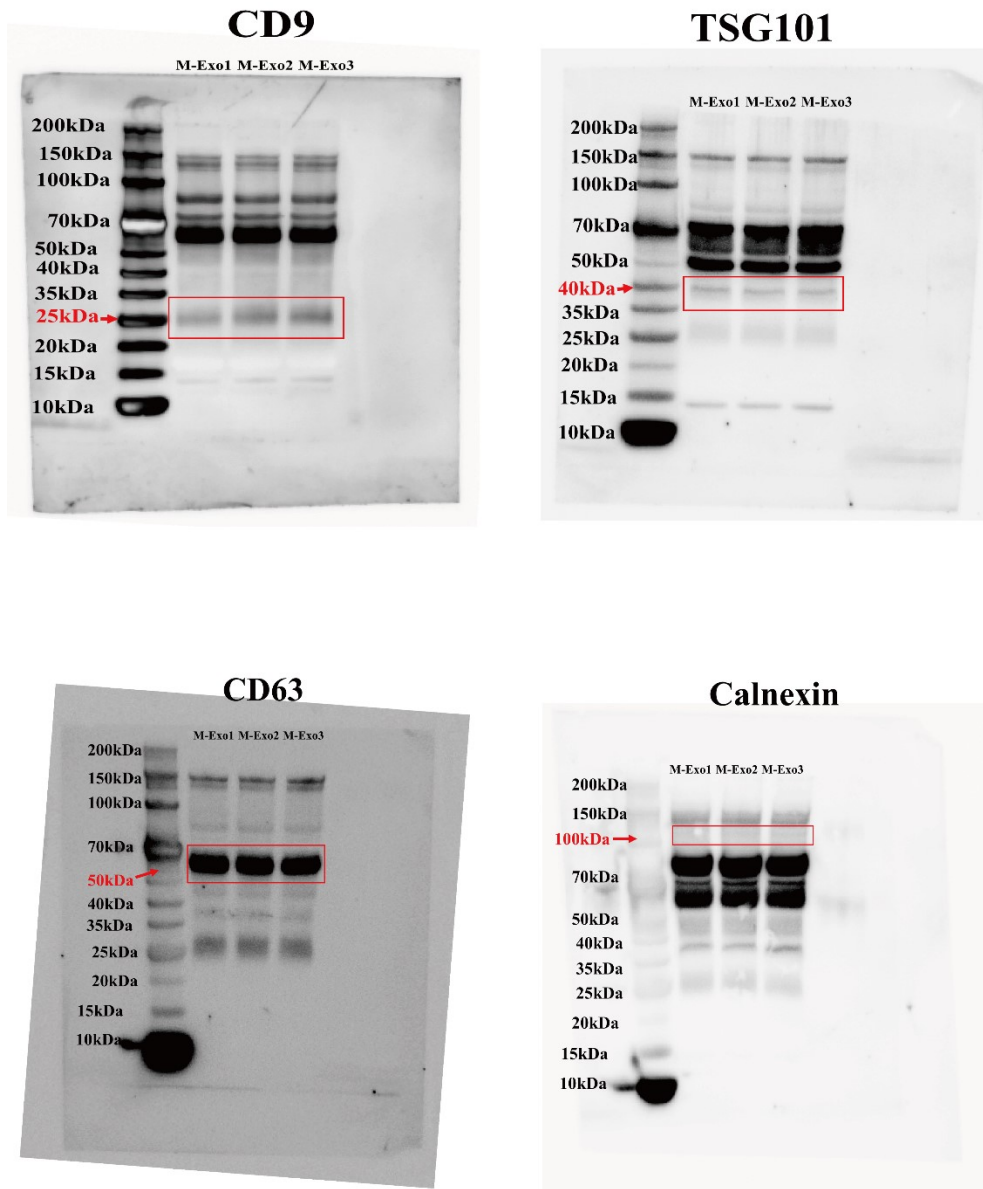

Supplement: d6fo00469e1.pdf [file d6fo00469e1.pdf]
